**Cilia, Ciliated Epithelium and Ciliary Activity.** Volume 15 of International Series of Monographs on Pure and Applied Biology—Modern Trends in Physiological Sciences. By JOSÉ A. RIVERA, Naval Biological Laboratory of the School of Public Health, University of California, Berkeley. Cloth. \$9.50. Pp. 167, with 19 illustrations. Pergamon Press, New York, Oxford, London, Paris, 1962.

This book is a thorough review based on 1,335 references of the distribution, structure and function of cilia. It covers the effect on ciliary movements of temperature, moisture, some anesthetic agents and many chemical compounds used for treatment in clinical practice. From the numerous references the author has deduced that ciliary movement is one of the main defenses of the body, particularly in respiratory diseases. In no other compilation will you find such a comprehensive review of the cilia of the body.

M. DIGBY LEIGH, M.D.

**The Doctors' Dilemmas.** By LOUIS LASAGNA, M.D., Associate Professor of Pharmacology and Experimental Therapeutics, The Johns Hopkins University School of Medicine, Baltimore. Cloth. \$4.95. Pp. 306. Harper Brothers, 49 East 33rd St., New York 16, N. Y. 1962.

Dr. Lasagna, known to many physicians as a clinical pharmacologist, demonstrates his ability as an essayist in this provocative, informative and entertaining book. He has undertaken to explore a number of subjects related to the field of medicine. These include superstitions, history, the education of physicians, nutrition, cancer and mental health. The impact of religion and politics on medicine is also discussed.

With refreshing candor, Dr. Lasagna praises, criticizes and sometimes pokes fun at his medical colleagues, politicians, faddists, quacks and any person whose life may have been touched by some aspects of medicine, or who may have influenced its progress.

This book is worthwhile reading for physicians and laymen.

ROBERT T. PATRICK, M.D.

## OTHER BOOKS RECEIVED

The receipt of the following books is acknowledged, and this listing must be regarded as sufficient return for the courtesy of the sender.

**The Art of Thinking.** By DAGOBERT D. RUNES, Doctor of Philosophy, University of Vienna. Cloth. \$2.75. Pp. 90. Philosophical Library, Inc., 15 E. 40th St., New York, 1961.

**A Guide to Dissection in Gross Anatomy.** By RUSSELL T. WOODBURN, PH.D., Professor of Anatomy, Medical School, University of Michigan. Paper. Pp. 162, with 13 illustrations. Oxford University Press, New York, 1961.

**Hemodynamics of Aortic and Mitral Valve Disease.** By ALVIN J. GORDON, M.D., PAUL A. KIRSCHNER, M.D., AND HOWARD L. MOSCOVITZ, M.D. Cloth. \$5.75. Pp. 136 with 94 figures. Published by Grune and Stratton, Inc., 281 Park Avenue South, New York 16, N. Y. 1961.

**Illustrated Manual of Neurologic Diagnosis.** By R. DOUGLAS COLLINS, M.D., CAPTAIN, U.S.A.F., M.C., Neurologist 7505<sup>th</sup> U.S.A.F. Hospital, R.A.F. Burderop, Wiltshire, England; former special trainee for the National Institute of Neurological Diseases and Blindness, Jefferson Medical College Hospital, Philadelphia. With a Foreword by Rudolph Jaeger, M.D., Professor and Chief, Department of Neurological Surgery, Jefferson Medical College and Hospital, Philadelphia. Cloth. \$12.00. Pp. 177, with 97 illustrations. J. B. Lippincott Co., Philadelphia, 1962.

**Laboratory Medicine—Hematology.** SECOND EDITION. By JOHN B. MAILE, M.D., Professor of Pathology, University of Miami School of Medicine, Coral Gables, Florida, and Director of Clinical Pathology, Jackson Memorial Hospital, Miami, Florida. Cloth. \$17.00. Pp. 918, with 320 illustrations and 26 plates, including 10 in color. The C. V. Mosby Co., St. Louis, 1962.
